# Supplementary material for: Hydroxychloroquine as Prophylaxis for COVID-19: A Review
Source: Front Pharmacol. 2020 Dec 3;11:605185. doi: 10.3389/fphar.2020.605185 (PMC7744418; doi:10.3389/fphar.2020.605185)
Supplement: Supplementary file 1 [file table1.xlsx]

## Sheet: DB
CT code		Supplementary Table S1. Clinical trial search results	Population	Interventions	Loading dose (mg)	Dosage (mg)	Duration (max)	Maximum total dose	Dose intensity	Phase	Number	Primary endpoint
NCT04364815		The University of the Philippines Hydroxychloroquine PEP Against COVID-19 Trial	HCW	HCQ vs placebo	800 D1	400 daily	10 days	4400	440	Phase 3	960	Efficacy of HCQ Prophylaxis in Preventing COVID-19 infection (Incidence of COVID-19 infection confirmed by RT-PCR within the PEP treatment period (28 days) with or without symptoms of COVID-19 infection)
NCT04330144		Hydroxychloroquine as Post Exposure Prophylaxis for SARS-CoV-2(HOPE Trial)	Contacts	HCQ vs control	800 D1	400 D 2-5	5 days	2400	480	Phase 3	2486	After postexposure prophylaxis, the rate of COVID-19 conversion between two group
NCT04352946		HEalth Care Worker pROphylaxis Against COVID-19: The HERO Trial	HCW	HCQ vs placebo	/	400 daily	60 days	24000	400	Phase 3	374	Cumulative Incidence of COVID-19 Infection (Incidence of symptomatic and asymptomatic COVID-19 infection in health care workers)
NCT04331834		Pre-Exposure Prophylaxis With Hydroxychloroquine for High-Risk Healthcare Workers During the COVID-19 Pandemic 2020-001565-37	HCW	HCQ vs placebo	400 D1-4	400 weekly	180 days	11600	64	Phase 3	440	Confirmed cases of COVID-19 (defined by a positive PCR for SARS-CoV-2 or symptoms compatible with COVID-19 with seroconversion) in the PrEP group compared to the placebo group at any time during the 6 months of the follow-up in healthcare workers with negative PCR for SARS-CoV-2 on day 0 and negative serology for SARS-CoV-2 on day 0
NCT04363450		Hydroxychloroquine as Prophylaxis for COVID-19 in Healthcare Workers (HCQPreP)	HCW	HCQ vs placebo	400 D1	200 twice weekly	84 days	5200	62	Phase 3	1700	Incidence of symptomatic COVID-19 infection in healthcare workers (Number of participants who develop symptoms of COVID-19 in the setting of a positive COVID-19 assay)
NCT04359537		Efficacy of Various Doses of Hydroxychloroquine in Pre-Exposure Prophylaxis for COVID 19	HCW	HCQ vs placebo	400/200 D1	400 weekly/every 3 weeks /200 every 3 weeks	84 days	5200	62	Phase 2	200	COVID-19-free survival in experimental arms compared to placebo (Outcome reported as the percentage of participants in each arm who are COVID-19-free at the end of study treatment)
NCT04349228		Assessment of the Efficacy and Safety of (HCQ) as a Prophylaxis for COVID19 for Health Professionals	HCW	HCQ vs placebo	/	200 daily	60 days	12000	200	Phase 3	530	Symptomatic COVID(+) infection rate (from randomization to the onset of signs suggestive of Covid19 infection or to the end of the study at 60 days) The rate of COVID19 infections is defined by the occurrence of any COVID-19 clinical signs
NCT04372017		Hydroxychloroquine as Post-Exposure Prophylaxis Against COVID-19 Infection	HCW	HCQ vs placebo	800 D1	400 D 2-5	5 days	2400	480	Phase 3	1739	Cohort A: Percentage of COVID-19 exposed healthcare workers treated with hydroxychloroquine with a positive COVID-19 test. Cohort B: Percentage of COVID-19 exposed high-risk individuals treated with hydroxychloroquine with a positive COVID-19 test.
NCT04336748		HCQ for Primary Prophylaxis Against COVID19 in Health-care Workers	HCW	HCQ vs placebo	/	200 daily	28 days	5600	200	Phase 3	440	Symptomatic or asymptomatic SARS-CoV-2 infection confirmed by PCR
NCT04408456		Efficacy of Hydroxychloroquine (HCQ) as Post Exposure Prophylaxis (PEP) for Prevention of COVID-19	Axcept healthcare workers	HCQ vs control	400 D1	400 weekly	21 days	1600	76	Phase 3	200	Incidence confirmed case of COVID-19 (Participant with RTPCR positive for SARS-CoV-2 and with or without symptoms will be defined as definite COVID-19 case); Incidence of probable case of COVID-19 (The participant with new onset symptoms, but RTPCR negative for SARS-CoV-2 or could not be performed for any reason will be defined as probable COVID-19 case)
NCT04328961		Hydroxychloroquine for COVID-19 Post-exposure Prophylaxis (PEP)	Contacts	HCQ vs ascorbic acid	400 D1-3	200 D 4-14	14 days	3400	243	Phase 2/3	2000	Polymerase chain reaction (PCR) confirmed SARS-CoV-2 infection from self-collected samples collected daily for 14 days and at study exit
NCT04384458		COVID-19 Prophylaxis With Hydroxychloroquine Associated With Zinc For High-Risk Healthcare Workers	HCW	HCQ + Zinc	800 D1	400 D 2-5, 400 every 5 days	50 days	6000	120	NA	400	Proportion of participants in whom there was a a positivity for SARS-CoV-2 through specific examination (RT-PCR) or by serology for antibodies specific (IgM and IgG), corroborated or not with clinical finding of COVID-19, defined as the occurrence of signs and symptoms suggestive of this disease
NCT04318444		Hydroxychloroquine Post Exposure Prophylaxis for Coronavirus Disease (COVID-19)	Contacts (household)	HCQ vs placebo	400 D1	200 D 2-5	5 days	1200	240	Phase 2/3	1600	Number of participants with symptomatic, lab-confirmed COVID-19. This is defined as either 1. COVID-19 infection confirmed within 14 days of enrollment, following self-report of COVID-19 symptoms to the research study; OR, 2. COVID-19 infection confirmed within 14 days of enrollment, with self-report of COVID-19 symptoms to a treating physician
NCT04377646		A Study of Hydroxychloroquine and Zinc in the Prevention of COVID-19 Infection in Military Healthcare Workers	HCW	HCQ vs placebo vs zinc	400 D1-2	400 weekly	60 days	4000	67	Phase 3	660	Frequency of confirmed SARS CoV2 infection
NCT04374942		Does Hydroxychloroquine Before & During Patient Exposure Protect Healthcare Workers From Coronavirus? (HEROs)	HCW	HCQ vs placebo	/	400 daily	90 days	36000	400	Phase 3	988	Microbiologically confirmed COVID-19 (SARS-CoV-2 infection) This is a composite endpoint which includes any positive result from a validated SARS-CoV-2 diagnostic assay including detection of viral RNA, or seroconversion by day 104 (14 days after end of the randomization period)
NCT04370015		Hydroxychloroquine Chemoprophylaxis for COVID-19 Infection in High-risk Healthcare Workers.	HCW	HCQ vs placebo	400 D1	400 weekly	77 days	14800	192	phase 3	374	Prevention of SARS-CoV-2 as determined by negative RT-PCR at the end of 12 week study period; Safety as determined by presence or absence of any adverse event related with hydroxychloroquine treatment
NCT04335084		A Study of Hydroxychloroquine, Vitamin C, Vitamin D, and Zinc for the Prevention of COVID-19 Infection	HCW	HCQ + vit C + Vit D + Zinc vs Vit C + Vit D + Zinc	D1	/	/	unk	unk	Phase 2	600	Prevention of COVID-19 symptoms as recorded in a daily diary; Safety as determined by presence or absence of Adverse Events and Serious Adverse Events
NCT04341441		Will Hydroxychloroquine Impede or Prevent COVID-19	HCW	HCQ daily vs HCQ weekly vs placebo	400 D1	400 weekly/200 daily	56 days	11600	207	Phase 3	3000	To determine if the use of hydroxychloroquine as preventive therapy decreases the rate of acquisition of SARS-CoV 2 infections and clinical COVID-19 disease in Study Participants for each randomized treatment arm as compared to placebo
NCT04344379		Prevention of SARS-CoV-2 in Hospital Workers s Exposed to the Virus	HCW	HCQ vs AZ vs placebo	/	400 daily	40 days	16000	400	Phase 3	900	To assess the impact of hydroxychloroquine and azithromycin on the prevention of SARS-CoV-2 contamination in hospital workers exposed to 40 days of treatment (The number of hospital workers with a positive serology or a positive PCR within 40 days of follow-up)
NCT04389359		PROphylaxis for paTiEnts at Risk of COVID-19 infecTion (PROTECT)	Vulnerable patients	HCQ vs control	800 D1 no dialysis	200 tri-weekly 400 weekly (no dialysis)	180 days	10800	60	Phase 2/3	1500	Time to confirmed COVID-19 diagnosis via online questionnaires at 6 weekly intervals
NCT04333225		Hydroxychloroquine in the Prevention of COVID-19 Infection in Healthcare Workers	HCW	HCQ	400 D1	200 weekly	49 days	1800	37	Phase 2	228	Rate of COVID-19 positive conversion on weekly nasopharyngeal (NP) sampling
NCT04303507		Chloroquine/ Hydroxychloroquine Prevention of Coronavirus Disease (COVID-19) in the Healthcare Setting (COPCOV)	HCW	HCQ vs control	800 D1	200 daily	90 days	18600	207	NA	40000	Number of symptomatic COVID-19 infections will be compared between the chloroquine or hydroxychloroquine and placebo groups
NCT04342156		Safety And Efficacy Of Hydroxychloroquine For At Risk Population (SHARP) Against COVID-19	Contacts (household)	HCQ vs control	800 D1	400 D 2-5	5 days	2400	480	Phase 3	1200	positive serology or reverse transcriptase (RT-PCR) for COVID-19 up until day 28
NCT04329923		The PATCH Trial (Prevention And Treatment of COVID-19 With Hydroxychloroquine)	HCW	HCQ vs placebo	/	600 daily	60 days	36000	600	Phase 2	400	Median release from quarantine time ( home quarantined COVID-19 patients: Median time to release from quarantine by meeting the following criteria: 1) No fever for 72 hours 2) improvement in other symptoms and 3) 7 days have elapsed since the beginning of symptom onset); Rate of hospital discharge (hospitalized COVID-19 patients: Rate of participants discharged at or before 14 days); Rate of infe…
NCT04354597		Hydroxychloroquine and Azithromycin as Prophylaxis for Healthcare Workers Dealing With COVID19 Patients	HCW	HCQ + AZ vs control	400 D1-3	400 weekly	112 days	7600	67	NA	200	Effect of HCQ and AZ in preventing infection with COVID-19 among healthcare workers working with COVID-19 patients (Compare the proportion of participants who have RT-PCR confirmed infection with SARS-CoV-2 in both arms during the study period, measured by negative PCR test for SARS COV-2 virus)
NCT04340349		Low-dose Hydroxychloroquine and Bromhexine: a Novel Regimen for COVID-19 Prophylaxis in Healthcare Professionals	HCW	HCQ +- bromhexine vs bromhexine	/	200 daily	60 days	12000	200	Phase 1	140	PCR negative until day 60Polymerase chain reaction assay (PCR) negative at day 0 plus negative serological panel for COVID-19 antibodies at enrolment; Polymerase chain reaction assay (PCR) negative at day 30; Polymerase chain reaction assay (PCR) negative at day 60
NCT04400019		Prevention of COVID19 Infection in Nursing Homes by Chemoprophylaxis With Hydroxychloroquine (PREVICHARM)	HCW	HCQ vs control	800 D1	400 D2-4	4 days	2000	500	Phase 2/3	1930	Number of secondary cases of SARS-CoV2 infection among residents at 6, 14, 28 days; SARS-CoV-2 infection in nursing home staff who provide direct care at 6, 14, 28 days.
NCT04308668		Post-exposure Prophylaxis / Preemptive Therapy for SARS-Coronavirus-2	Contacts	HCQ vs placebo	1200 D1	600 D2-5	5 days	3600	720	Phase 3	3000	Incidence of COVID19 Disease among those who are asymptomatic at baseline (number of participants at 14 days post enrollment with active COVID19 disease); Overall change in disease severity over 14 days among those who are symptomatic at baseline (Repeated Measure mixed regression model of change in: Visual Analog Scale 0-10 score of rating overall symptom severity)
NCT04397328		COVID-19 PEP- High-risk Individuals in Long-term and Specialized Care - Canada	Vulnerable patients	HCQ vs placebo	800 D1	400 D 2-5	5 days	2400	480	Phase 3	336	Incidence of symptomatic fever >37.8, dry cough, or shortness of breath (resident/patient report or nurse observation) respiratory infection with confirmed PCR+ result for SARS-CoV-2
NCT04363827		Protect: Study With Hydroxychloroquine for Prevention and Early Phase Treatment of Coronavirus Disease (COVID-19)	Contacts	HCQ vs control	800 D1	400 weekly	28 days	2400	86	Phase 2	2300	The proportion of exposed contacts who become symptomatic and/or swab positive in each arm within 1 month from randomization; the proportion of COVID-19 patients who become swab negative in each arm within 14 days from randomization
NCT04328467		Pre-exposure Prophylaxis for SARS-Coronavirus-2	HCW	HCQ weekly vs bi weekly vs placebo	800 D1	400 weekly/biweekly	84 days	10400	124	Phase 3	1500	COVID-19-free survival (Outcome reported as the percent of participants in each arm who are COVID-19-free at the end of study treatment)
NCT04345653		Hydroxychloroquine as Chemoprevention for COVID-19 for High Risk Healthcare Workers	HCW	HCQ	400 D1	400 weekly	21 days	1600	76	Phase 2	45	To evaluate the feasibility of this protocol including participants' recruitment within the estimated time frame; to evaluate the utilization of tests and drug for this study in consideration with the limited availability of both for research purposes; to Determine the Safety profile for a previously well studied drug in this select group of HCP. Incidence of well described side effects would be …
NCT04414241		Hydroxychloroquine to Prevent SARS-CoV-2 Infection	HCW	HCQ vs control	600 D1	400 every other day	56 days	11800	211	Phase 3	320	Efficacy: Proportion of participants with positive molecular or serologic testing for SARS-CoV-2; Safety: Proportion of participants with grade 3 or more adverse events
NCT04334928		Prevention of SARS-CoV-2 (COVID-19) through Pre-Exposure Prophylaxis with Tenofovir disoproxil/Emtricitabine and Hydroxychloroquine in Healthcare Personnel: Randomized Clinical Trial controlled with placebo	HCW	HCQ + placebo Emtricitabine/tenofovir disoproxil vs placebo HCQ + Emtricitabine/tenofovir disoproxil vs HCQ + Emtricitabine/tenofovir disoproxil vs placebo HCQ + placebo Emtricitabine/tenofovir disoproxil	/	200 daily	84 days	16800	200	Phase 3	4000	Number of confirmed symptomatic infections of SARS-CoV-2 (COVID-19)
NCT04364022		Efficacy of Pragmatic Same-day COVID-19 Ring Prophylaxis for Adult Individuals Exposed to SARS-CoV-2 in Switzerland	Contacts	HCQ vs lopinavir/ritonavir vs control	800 D1	/	/	800	800	Phase 3	420	21-day incidence of COVID-19 in individuals exposed to SARS-CoV- 2 who are asymptomatic at baseline (intent-to-treat (ITT) analysis)
NCT04353037		PATCH 2&3:Prevention & Treatment of COVID-19 (Severe Acute Respiratory Syndrome Coronavirus 2) With HCQ	HCW	HCQ vs control	/	600 daily	60 days	36000	600	Phase 2	850	For patients, the rate of hospitalization; for health care workers, the rate of COVID-19 infection (confirmed by accepted testing methods) at 2 months
NCT04381988		A Study of Hydroxychloroquine vs Placebo to Prevent COVID-19 Infection in Patients Receiving Radiotherapy	Cancer patients treated with radiotherapy	HCQ vs control	/	400 daily	unk	unk	unk	Phase 2	132	Cumulative incidence of SARS-CoV-2 infection (Any patients who are enrolled and subsequently test positive for SARS-CoV-2 by RT-PCR at any point during the 9 weeks following enrollment will be an event that is considered in the 9-week SARS-CoV-2 infection rate primary endpoint)
NCT04304053		Treatment of COVID-19 Cases and Chemoprophylaxis of Contacts as Prevention	Contacts	HCQ vs control	800 D1	400 D 2-4	4 days	2000	500	Phase 3	3040	Clinical and virological outcome in exposed contacts (Incidence of secondary PCR confirmed symptomatic Covid-19 episodes among contacts after high risk PCR+ exposure); Transmission of SARS-CoV-2 in exposed contacts (Incidence of symptomatically compatible or a PCR-positive result regardless of symptoms); Virological outcome in index cases (Reduction of viral RNA load in nasopharyngeal swabs at da…
NCT04318015		Hydroxychloroquine Chemoprophylaxis in Healthcare Personnel in Contact With COVID-19 Patients (PHYDRA Trial)	HCW	HCQ vs placebo	/	200 daily	60 days	12000	200	Phase 3	400	Symptomatic COVID-19 infection rate (Symptomatic infection rate by COVID-19 defined as cough, dyspnea, fever, myalgia, arthralgias or rhinorrhea along with a positive COVID-19 real-time polymerase chain reaction test)
NCT04354870		COVID-19 PrEP HCW HCQ Study	HCW	HCQ vs control	600 D1	200 daily	90 days	18600	207	Phase 2	350	Frequency of seroconversion to SARS-CoV-2 (Antibody titers will be measured to determine seroconversion, a binomial endpoint defined by a four-fold increase in antibody titers compared to baseline)
NCT04347889		Preventing COVID-19 in Healthcare Workers With HCQ: A RCT	HCW	HCQ vs Vitamin C	800 D1	400 weekly	90 days	5600	62	Phase 2	1212	COVID-19 Seroconversion rate (Percentage of healthcare worker who develop antibodies to SARS-CoV-2)
NCT04346329		Immune Monitoring of Prophylactic Effect of Hydroxychloroquine in Healthcare Providers Highly Exposed to COVID-19	HCW	HCQ vs placebo	800 D1	400 weekly	90 days	5600	62	Phase 3	86	Adverse effects (Number of participants with treatment-related adverse events as associated administration of hydroxychloroquine or placebo)
NCT04328285		Chemoprophylaxis of SARS-CoV-2 Infection (COVID-19) in Exposed Healthcare Workers	HCW	HCQ vs placebo vs lopinavir and ritonavir	400 D1-2	200 daily	60 days	12800	213	Phase 3	1200	Occurrence of an symptomatic or asymptomatic SARS-CoV-2 infection among healthcare workers (HCWs)
NCT04334148		Healthcare Worker Exposure Response and Outcomes of Hydroxychloroquine	HCW	HCQ vs placebo	600 D1	400 daily	30 days	12600	420	Phase 3	15000	Number of participants with clinical infection with COVID-19 infection(hydroxychloroquine vs placebo)
NCT04371523		Hydroxychloroquine to Prevent COVID-19 Disease Amongst Healthcare Workers	HCW	HCQ vs placebo	400 D1	400 weekly	60 days	3600	60	Phase 3	1100	Positive for SARS-CoV-2 (The number of HCW that tested positive for SARS-CoV-2)
NCT04352933		PROLIFIC ChemoprophylaxisTrial (COVID-19)	HCW	HCQ Daily vs weekly vs placebo	400 D1-2	200 daily/400 weekly	90 days	18800	209	Phase 3	1000	Time to positive COVID-19 disease (Time taken for incidence of COVID-19 disease between Hydroxychloroquine and placebo arms)
NCT04386070		Preventing Pulmonary Complications in Surgical Patients at Risk of COVID-19	Patients undergoing surgery	Lopinavir-ritonavir vs HCQ vs Control vs lopinavir-ritonavir-HCQ	800 D1	400 daily day 2-5	5 days	2400	480	Phase 3	6400	Pneumonia free survival; acute respiratory distress syndrome (ARDS) free survival; or death (The primary outcome is any one of the following COVID-19 specific, inpatient, postoperative pulmonary complications: Pneumonia Acute respiratory distress syndrome (ARDS) Death)
NCT04438837		Hydroxychloroquine Post-Exposure Prophylaxis for Coronavirus Disease (COVID-19) Among Health-Care Workers	HCW	HCQ vs control	800 D1	400 D2-D10	10 days	4400	440	NA	582	Number of patients developing clinical symptoms and signs compatible with COVID-19 following exposure (14 day of observation)
NCT04437693		Post Exposure Prophylaxis in Healthcare Workers Exposed to COVID-19 Patients	HCW	HCQ vs placebo	800 D1	400 weekly	49 days	3600	73	phase 2/3	500	Prevention of SARS-CoV-2 infection as determined by negative RT-PCR of the participants in the treatment group through swabbing that will be conducted on a weekly basis (Swabbing will be conducted at baseline and weekly through the end of the treatment period
NCT04435808		Efficacy of Hydroxychloroquine Prophylaxis for Health Care Workers at High Risk for COVID-19	HCW	HCQ or control (HCW choice)	600 D1	200 daily	90 days	18400	204	phase 1/2	350	Number of health care workers who become infected with SARS-CoV-2 as detected by PCR (3 months of observation)
NCT04446104		A Preventive Treatment for Migrant Workers at High-risk of COVID-19	migrant workers	HCQ vs Ivermectin vs Zinc vs Povidone-Iodine vs Vitamin C	400 D1	200 daily	42 days	8600	204	phase 3	4257	Incidence of laboratory-confirmed COVID-19 in treatment arms
2020-001697-30		Pre-exposure prophylaxis with hydroxychloroquine in sanitaries highly exposed to COVID-19 (COVIDNA)	HCW	HCQ vs control	unk	155 daily for 6 weeks	42 days	6510	155	phase 3	200	To assess the efficacy and safety of 155 mg of hydroxychloroquine base as prophylaxis in health professionals subjected to repeated exposures to the COVID-19 virus, to reduce the contagion measured as development of Ig M antibodies. Professionals must be negative for the disease at the beginning of the randomized study
2020-001421-31		Clinical trial randomized, unblinded and controled for evaluation of efficacy and safety of hydroxychloroquine chemoprophylaxis against SARS-CoV-2 (COVID-19) infection in healthcare professionals.	HCW	HCQ vs control	400 D1	200 daily on week 1 and 200 every 72 hours on days +9, +12, +15, +18, +21, +24 vs 200 every 48 hours on week 1 (days +2, +4, +6) and 200 every 72 hours on days +9, +12, +15, +18, +21, +24).	28 days	2800	100	Phase 3	2163	To assess the efficacy of hydroxychloroquine as chemoprophylaxis against SARS-CoV-2 (COVID-19) infection in healthcare professionals by negative PCR.
2020-001363-85		COVID-19 Prophylaxis with hydroxychloroquine, Vitamin D, and Zinc supplementation in Danish nursing home residents – a randomized controlled trial	Nursing home residents	HCQ + Zinc + Vit C vs control	unk	unk	60 days	unk	unk	phase 3	206	To investigate whether prophylactic treatment with daily hydroxychloroquine, vitamin D, and zinc supplementation reduces the risk of COVID-19, the severity of the disease, the hospitalization rate, and death in nursing home residents
2020-001536-98		Prophylaxis of COVID-19 infection with hydroxychloroquine in healthcare personnel with high risk of infection.	HCW	HCQ vs control	unk	unk	unk	unk	unk	Phase 3	330	Incidence of symptomatic healthcare professionals with positive PCR between day 15 and day 30 of inclusion in the study. Health professionals with high risk of transmissio taking prophylaxis (Group A) and the control group of high risk health professionals who decide not to take it (Group C1) will be compared; Incidence of symptomatic healthcare professionals with positive PCR between day 15 and …
2020-001257-51		The Danish Pre-HCQ Dialysis Study: Hydroxychloroquine for prevention of COVID-19 in dialysis-treated patients with end-stage renal disease - A multicenter parallel-group open randomized clinical trial	Vulnerable patients (dialysis)	HCQ vs control	unk	unk	unk	unk	unk	phase 3	568	The main objective of the following multicentre parallel-group open randomized clinical trial aims to investigate the benefit, tolerability, and safety of initiating prophylactic hydroxychloroquine versus no treatment in patients on chronic dialysis in Denmark. The anticipated results from this project will provide evidence as to the appropriateness of initiating prophylactic treatment for preven…
2020-002287-31		Prevention of COVID19 infection with hydroxychloroquine in institutionalized older people and nursing home staff. An open, randomized controlled stepped-wedge clinical trial by clusters. PREVICHARM Study	Older people in nursing homes	HCQ vs placebo	unk	400 unk	unk	unk	unk	phase 2/3	1930	to evaluate the effectiveness of prophylactic administration of hydroxychloroquine in the staff who provide direct care and in institutionalized people, on the incidence of secondary cases of SARS-CoV-2 infection in residents and professionals in the 4 weeks after the start of the trial. The effects on reduction in mortality and hospital admissions, incidence of symptoms, and drug safety will als…
2020-001440-26		Pilot, double-blind clinical trial to evaluate the efficacy and safety of pre-exposure use of hydroxychloroquine versus placebo in the prevention of SARS-CoV-2 (COVID-19) infection in healthcare personnel.	HCW	HCQ vs placebo	unk	unk	60 days	unk	unk	phase 3	184	To assess the efficacy of hydroxychloroquine preventive administration in healthcare personnel with risk of exposure to COVID-19 infected patients
2020-001704-42		Controlled and randomised trial to assess the safety and efficacy of hydroxychloroquine chemoprophylaxis in SARS CoV2 infection in hospital healthcare personnel (Sanitarios sin COVID-19 -SANsinCOVI...	HCW	HCQ vs placebo	unk	unk	unk	unk	unk	Phase 4	450	To evaluate the efficacy of prophylaxis with Hydroxychloroquine for 2 months versus placebo in the prevention and reduction of symptomatic and asymptomatic CoV-2 SARS infection in healthcare personnel
2020-001031-27		Treatment of non-severe confirmed cases of COVID-19 and chemoprophylaxis of their contacts as prevention strategy: a Cluster Randomized Clinical Trial (PEP CoV-2 Study)	contacts	HCQ vs placebo	unk	800 unk	unk	unk	unk	phase 3	3040	Evaluate the transmissibility of SARS-CoV-2 and reduction of disease progression within the study population over the course of the outbreak; Explore the effect of the intervention on patient individual parameters.
2020-001987-28		PRECOV: a randomized controlled clinical trial on the effects of hydroxychloroquine in the prevention of COVID-19 in healthcare workers at risk	HCW	HCQ vs control	/	400 daily	28 days	11200	400	Phase 3	1000	To evaluate the efficacy of the preventive treatment with hydroxychloroquine in reducing the risk of SARS-CoV-2 infection in healthcare workers at risk
2020-001357-52		Randomized, Controlled, Double-blind Clinical Trial Comparing the Efficacy and Safety of Chemoprophylaxis With Hydroxychloroquine in Patients Under Biological Treatment and / or JAK Inhibitors in the Prevention of SARS-CoV-2 Infection.	vulnerable patients (inflammatory disease)	HCQ vs placebo	unk	unk	180 days	unk	unk	phase 4	800	Evaluate the efficacy of Hydroxychloroquine prophylaxis for 6 months versus placebo in preventing SARS-CoV-2 infection in patients with an immune-mediated inflammatory disease treated with biological agents and / or Jak inhibitors.
2020-001565-37		Prevention of novel Coronavirus infection with hydroxychloroquine	HCW	HCQ vs placebo	unk	unk	unk	unk	unk	phase 3	440	Confirmed cases of a COVID-19 (defined by symptoms compatible with COVID-19 and/or a positive PCR for SARS-CoV-2) in the PrEP group compared to the placebo group at any time during the 6 months of the follow-up in healthcare workers with negative PCR for SARS-CoV-2 at day 0.
ChiCTR2000032487		Study for using sulfate in the prevention and control of novel coronavirus pneumonia (COVID-19) in high and low prevalence communities	Contacts	HCQ vs placebo	unk	unk	unk	unk	unk	phase 4	2000	unk
ChiCTR2000031174		Effectiveness and safety of hydroxychloroquine sulfate in the preventive treatment of novel coronavirus pneumonia (COVID-19)	Volunteers	HCQ vs placebo	unk	unk	unk	unk	unk	phase 3	1000	To evaluate the effectiveness and safety of hydroxychloroquine sulfate in the prophylactic treatment of new coronavirus infections
IRCT20120826010664N6		Comparison of the effect of hydroxychloroquine with placebo on prevention of virus Covid-19 in Arash hospital treatment staffs	HCW	HCQ vs placebo	/	400 weekly	90 days	4800	53	phase 3	310	Covid-19 virus infection at ne, two and three months after starting the drug, as measured by Covid-19 PCR test and clinical symptoms
IRCT20200405046958N1		Determining the effect of hydroxychloroquine on the prevention of Novel Coronavirus Disease (COVID-19) in patients with cancer.	Cancer patients	HCQ vs placebo	/	200 every other day	60 days	6000	100	phase 2/3	60	COVID-19 incidence rate in cancer patients under treatment (Patients are examined and investigated if they become symptomatic during the 2 months of study; a history and physical examination are performed for the symptoms of COVID-19, and if the test is positive, a computerized tomography scan of the lungs and a nucleic acid amplification test for the SARS-CoV-2 virus)
IRCT20190122042450N4		Prevention of COVID-19 disease after contact with an infected patient with coronavirus after taking hydroxychloroquine in the community	Contacts	HCQ vs control	400 D1-2	200 daily	14 days	3600	257	phase 3	1000	Reduction of incubation time
IRCT20200414047076N1		Evaluate the efficacy of hydroxychloroquine in the prevention of SARS-COV2 infection in high risk health care workers	HCW	HCQ vs control	/	400 weekly	90 days	4800	53	phase 2	320	The prevalence of affection or the severity of illness will be compared in the two groups
IRCT20200513047426N1		The prophylactic effect of oral hydroxy-chloroquine in close contacts of COVID-19 patients	contacts	HCQ vs placebo (Vit B1)	400 D1	200 D2-6	6 days	1400	233	phase 3	500	Percentage of people who have not been diagnosed with Covid19 after co-administration of hydroxychloroquine.
CTRI/2020/03/024402		Hydroxy Chloroquine, in open labelled, Randomised intervention for prevention of new infection and adverse outcomes following COVID-19 infection -A Tertiary Hospital based study	Contacts	HCQ vs control	/	300 daily	49 days	14700	300	phase 3	500	Infected vs Non infected
CTRI/2020/05/025067		A randomized controlled trial of hydroxychloroquine prophylaxis for Healthcare Workers exposed to COVID-19	HCW	HCQ vs control	800 D1	400 weekly	84 days	9600	114	phase 3	10990	Proportion of laboratory confirmed symptomatic COVID-19 cases between the groups at the end of 6 months
CTRI/2020/05/025242		Hydroxychloroquine of pharmacokinetics in healthcare workers	HCW	HCQ	unk	unk	unk	unk	unk	unk	400	unk
SLCTR/2020/011		Hydroxychloroquine for Post-Exposure Prophylaxis of COVID-19 among naval personnel: a placebo-controlled, randomized, clinical trial (Sri Lanka)	Naval personnel	HCQ vs placebo	unk	unk	unk	unk	unk	phase 4	400	Number of participants symptomatic for COVID-19. (Symptomatic illness will be defined as presence of fever with cough, shortness of breath, sore throat, anosmia or diarrhoea)
ACTRN12620000501943		Effectiveness of Prophylactic Hydroxychloroquine on incidence of COVID-19 infection in Front-line Health and Allied Health Care Workers: The COVID-SHIELD Trial (Australia)	HCW	HCQ vs placebo	/	400 daily (≥65kg body weight) or 200 daily (<65kg body weight);	120 days	48000	400	phase 2/3	2250	Incidence of COVID-19 using standard PCR analysis for COVID-19
JPRN-jRCTs051200060		Prohylaxis with hydroxichloroquine aiming at prevention of COVID-19 for medical care workers	HCW	HCQ	/	200-400 daily	7 days	1400-2800	200-400	unk	500	Serious adverse events during the drug administration period
PACTR202009786901147		Hydroxychloroquine for prevention of COVID-19	unk	HCQ vs placebo	unk	unk	unk	unk	unk	unk	1600	unk
			unk, unknown
